# Supplementary material
Source: PubMed Central journal article supplement (PMC9330544)
Supplement: NIHMS1807276-supplement-Tables_S1-S7.pdf [file NIHMS1807276-supplement-Tables_S1-S7.pdf]

---

**Supplementary information**

---

**Intestinal *Akkermansia muciniphila*  
predicts clinical response to PD-1 blockade  
in patients with advanced non-small-cell  
lung cancer**

---

In the format provided by the  
authors and unedited

Supplementary Table 1. Prevalence of various substrains of *Akkermansia* in our cohort.

|                                                                | SGB                      |                   |                   |                   |                   |
|----------------------------------------------------------------|--------------------------|-------------------|-------------------|-------------------|-------------------|
|                                                                | 9226 – MucT<br>– no. (%) | 9228<br>– no. (%) | 9224<br>– no. (%) | 9223<br>– no. (%) | None<br>– no. (%) |
| <b>Prevalence of SGBs in all patients (n=338)</b>              | 131/338 (38.8)           | 26/338 (7.7)      | 5/338 (1.5)       | 1/338 (0.3)       | 175/338 (51.7)    |
| <b>Prevalence of SGBs in SGBs<sup>+</sup> patients (n=163)</b> | 131/163 (80.4)           | 26/163 (15.9)     | 5/163 (3.1)       | 1/163 (0.6)       | -                 |

1 SGBs: *Akkermansia* candidate species or species-level genome bins; MucT: *A. muciniphila*.

**Table S A. Patient clinical characteristics**

|                                  |                       | Overall (n=338) | Akk <sup>+</sup> (n=131) | Akk <sup>-</sup> (n=207) | P-value |
|----------------------------------|-----------------------|-----------------|--------------------------|--------------------------|---------|
| Age (year)                       | Median (range)        | 65 (24-92)      | 66 (44-85)               | 64 (24-92)               |         |
|                                  | <65 yr                | 163 (48)        | 55 (42)                  | 108 (52)                 | 0.08*   |
|                                  | ≥65 to <75 yr         | 118 (35)        | 57 (43)                  | 61 (29)                  |         |
|                                  | ≥75 yr                | 57 (17)         | 19 (15)                  | 38 (18)                  |         |
|                                  |                       |                 |                          |                          |         |
| Sex – no (%)                     | Male                  | 226 (67)        | 86 (66)                  | 140 (68)                 | 0.72    |
|                                  | Female                | 112 (33)        | 45 (34)                  | 67 (32)                  |         |
| BMI, kg/cm <sup>2</sup> – no (%) | <25                   | 204 (60)        | 74 (56)                  | 130 (63)                 | 0.66    |
|                                  | [25-30[               | 94 (28)         | 40 (31)                  | 54 (26)                  |         |
|                                  | ≥30                   | 36 (11)         | 16 (12)                  | 20 (10)                  |         |
|                                  | Unknown               | 4 (1)           | 1 (1)                    | 3 (1)                    |         |
| ECOG performance status – no (%) | 0-1                   | 268 (79)        | 111 (85)                 | 157 (76)                 | 0.08    |
|                                  | 2 or more             | 43 (13)         | 10 (8)                   | 33 (16)                  |         |
|                                  | Unknown               | 27 (8)          | 10 (8)                   | 17 (8)                   |         |
| Smoking status — no. (%)         | Never smoked          | 26 (8)          | 12 (9)                   | 14 (7)                   | 0.73    |
|                                  | Current/former smoker | 309 (91)        | 118 (90)                 | 191 (92)                 |         |
|                                  | Unknown               | 3 (1)           | 1 (1)                    | 2 (1)                    |         |
| Tumor histology — no. (%)        | Squamous              | 78 (23)         | 34 (26)                  | 44 (21)                  | 0.35    |
|                                  | Non-squamous          | 260 (77)        | 97 (74)                  | 163 (79)                 |         |
| Tumor staging — no. (%)          | IIA-IIIB              | 37 (11)         | 15 (11)                  | 22 (11)                  | 0.97    |
|                                  | IV                    | 294 (87)        | 114 (87)                 | 180 (87)                 |         |

|                            |                                |          |          |          |      |
|----------------------------|--------------------------------|----------|----------|----------|------|
| TMB — no. (%)              | Unknown                        | 7 (2)    | 2 (2)    | 5 (2)    | 0.25 |
|                            | ≥ 10 mutations/megabase        | 3 (1)    | 1 (1)    | 2 (1)    |      |
|                            | < 10 mutations/megabase        | 13 (4)   | 9 (7)    | 4 (2)    |      |
| PD-L1 status — no. (%)     | Unknown                        | 322 (95) | 121 (92) | 201 (97) | 0.41 |
|                            | <1%                            | 64 (19)  | 31 (24)  | 33 (16)  |      |
|                            | 1–49%                          | 53 (16)  | 22 (17)  | 33 (16)  |      |
| Therapy line — no. (%)     | ≥50%                           | 118 (35) | 42 (32)  | 76 (36)  | 0.33 |
|                            | Unknown                        | 102 (30) | 36 (27)  | 66 (32)  |      |
|                            | Neoadjuvant                    | 3 (1)    | 2 (2)    | 1 (1)    |      |
| Therapy — no. (%)          | First line                     | 92 (27)  | 31 (24)  | 61 (29)  | 0.21 |
|                            | ≥ Second line                  | 243 (72) | 98 (75)  | 145 (70) |      |
|                            | Immunotherapy                  | 327 (97) | 129 (98) | 198 (96) |      |
| Previous therapy — no. (%) | Immunotherapy and Chemotherapy | 11 (3)   | 2 (2)    | 9 (4)    | 0.77 |
|                            | Chemotherapy                   | 239 (71) | 96 (73)  | 143 (69) |      |
|                            | Tyrosine kinase inhibitors     | 11 (3)   | 4 (3)    | 7 (3)    |      |
| Antibiotics — no. (%)      | Others                         | 20 (6)   | 6 (5)    | 15 (7)   | 0.68 |
|                            | Unknown                        | 3 (1)    | 2 (2)    | 1 (0)    |      |
|                            | Yes                            | 69 (20)  | 25 (19)  | 44 (21)  |      |
|                            | No                             | 269 (80) | 106 (81) | 163 (79) |      |

BMI, Body Mass Index; TMB, Tumor Mutational Burden.

Statistical analyses: Mann-Whitney\*, Chi-Square or Fisher's exact tests are two-sided, with no adjustments for multiple comparisons.

| <b>Table S B. List of antibiotics (ATB) 60 days prior to ICB</b> |                                                       |                       |                               |                               |                |         |      |
|------------------------------------------------------------------|-------------------------------------------------------|-----------------------|-------------------------------|-------------------------------|----------------|---------|------|
|                                                                  |                                                       | <b>Overall (n=69)</b> | <b>Akk<sup>+</sup> (n=25)</b> | <b>Akk<sup>-</sup> (n=44)</b> | <b>P-value</b> |         |      |
| Duration of ATB — no. (%)                                        | ≤ 7 days                                              | 23 (33)               | 10 (40)                       | 13 (30)                       | 0.73           |         |      |
|                                                                  | > 7 days                                              | 19 (28)               | 6 (24)                        | 13 (30)                       |                |         |      |
|                                                                  | Unknown                                               | 27 (39)               | 9 (36)                        | 18 (41)                       |                |         |      |
| Type of ATB — no. (%)                                            | β-lactams ± inhibitors (± combination with other ATB) | 48 (70)               | 20 (80)                       | 28 (64)                       | 0.33           |         |      |
|                                                                  | Quinolones (± combination with other ATB)             | 9 (13)                | 2 (8)                         | 7 (16)                        |                |         |      |
|                                                                  | Macrolides                                            | 5 (7)                 | 0 (0)                         | 5 (11)                        |                |         |      |
|                                                                  | Sulfonamides                                          | 8 (12)                | 4 (16)                        | 4 (9)                         |                |         |      |
|                                                                  | Tetracyclines                                         | 1 (1)                 | 0 (0)                         | 1 (2)                         |                |         |      |
|                                                                  | Aminoglycosides                                       | 1 (1)                 | 0 (0)                         | 1 (2)                         |                |         |      |
|                                                                  | Unknown                                               | 4 (6)                 | 1 (4)                         | 3 (7)                         |                |         |      |
|                                                                  | ECOG performance status — no. (%)                     | 0-1                   | 50 (72)                       | 21 (84)                       |                | 29 (66) | 0.08 |
|                                                                  |                                                       | 2 >                   | 13 (19)                       | 2 (8)                         |                | 11 (25) |      |
| Unknown                                                          |                                                       | 6 (9)                 | 2 (8)                         | 4 (9)                         |                |         |      |
| Number of ATB courses — no. (%)                                  | 1                                                     | 39 (57)               | 14 (56)                       | 25 (57)                       | 0.38           |         |      |
|                                                                  | 2                                                     | 15 (22)               | 8 (32)                        | 7 (16)                        |                |         |      |
|                                                                  | 3                                                     | 6 (9)                 | 1 (4)                         | 5 (11)                        |                |         |      |

|                      |                  |         |         |         |      |
|----------------------|------------------|---------|---------|---------|------|
|                      | 4                | 2 (3)   | 2 (8)   | 0 (0)   |      |
|                      | Unknown          | 6 (9)   | 0 (0)   | 7 (16)  |      |
|                      | Prophylactic ATB | 3 (4)   | 0       | 3 (7)   |      |
| Indication — no. (%) | Therapeutic ATB  | 52 (75) | 17 (68) | 35 (79) | 0.23 |
|                      | Unknown          | 14 (21) | 8 (32)  | 6 (14)  |      |

ATB, Antibiotics.

Statistical analyses: Chi-Square or Fisher's exact tests. All tests were two-sided, with no adjustments for multiple comparisons.

| Table S . Patient characteristics for mouse tumor models |                |                               |     |      |                |  |
|----------------------------------------------------------|----------------|-------------------------------|-----|------|----------------|--|
| ID                                                       | Type of cancer | Human donors                  |     |      | Mice           |  |
|                                                          |                | <i>A.muciniphila</i> SGB 9226 | ORR | OS12 | Type of cancer |  |
| P1                                                       | Lung           | 0                             | NR  | <12m | MCA205         |  |
| P2                                                       | Lung           | 4.14373                       | NR  | ≥12m | MCA205         |  |
| P3                                                       | Lung           | 5.29109                       | R   | <12m | MCA205         |  |
| P4                                                       | Lung           | 0                             | NR  | <12m | MCA205         |  |
| P5                                                       | Lung           | 0                             | NR  | ≥12m | MCA205         |  |
| P6                                                       | Lung           | 0                             | NR  | ≥12m | MCA205         |  |
| P8                                                       | Lung           | 0                             | NR  | <12m | MCA205         |  |
| P9                                                       | Lung           | 0                             | NR  | <12m | MCA205         |  |
| P10                                                      | Lung           | 3.09375                       | NR  | ≥12m | MCA205         |  |
| P11                                                      | Lung           | 0                             | NR  | <12m | MCA205         |  |
| P13                                                      | Lung           | 0                             | NR  | <12m | MCA205         |  |
| P14                                                      | Lung           | 0                             | NR  | <12m | MCA205         |  |
| P15                                                      | Lung           | 0                             | NR  | <12m | MCA205         |  |

|     |      |          |    |      |                   |
|-----|------|----------|----|------|-------------------|
| P16 | Lung | 0.46892  | NR | ≥12m | MCA205            |
| P17 | Lung | 0.24693  | NR | ≥12m | MCA205            |
| P18 | Lung | 0.72853  | NR | ≥12m | MCA205            |
| P19 | Lung | 0        | NR | <12m | MCA205            |
| P20 | Lung | 0        | NR | ≥12m | MCA205            |
| P21 | Lung | 2.18628  | NR | <12m | CT26, MC38, 4T1   |
| P22 | Lung | 0        | R  | ≥12m | B16F10, 4T1       |
| P23 | Lung | 0        | NR | <12m | MCA205            |
| P24 | Lung | 0        | NR | <12m | MC38, B16F10, 4T1 |
| P25 | Lung | 0        | NR | ≥12m | MCA205            |
| P26 | Lung | 0        | NR | <12m | MCA205, 4T1       |
| P27 | Lung | 0        | NR | <12m | MCA205            |
| P29 | Lung | 7.32764  | R  | ≥12m | MCA205            |
| P30 | Lung | 0        | NR | <12m | MCA205            |
| P31 | Lung | 13.30026 | NR | <12m | MCA205            |
| P32 | Lung | 22.53562 | NR | <12m | MCA205            |

Table illustrating information presented in S1 C-E and Extended Figure 6.

| <b>Table S . P atient characteristics for tumor biopsies used in RNA sequencing.</b> |                       |                       |                    |                    |                |
|--------------------------------------------------------------------------------------|-----------------------|-----------------------|--------------------|--------------------|----------------|
|                                                                                      |                       | <b>Overall (n=44)</b> | <b>Akk- (n=22)</b> | <b>Akk+ (n=22)</b> | <b>P-value</b> |
| Stage — no. (%)                                                                      | Limited               | 17 (39)               | 9 (41)             | 8 (36)             | <i>1.00</i>    |
|                                                                                      | Advanced              | 27 (61)               | 13 (59)            | 14 (64)            |                |
| Age (year)                                                                           | Median (range)        | 69 (55-82)            | 68 (58-78)         | 73 (55-82)         | <i>0.55</i>    |
|                                                                                      | <65 yr                | 12 (27)               | 6 (28)             | 6 (28)             |                |
|                                                                                      | ≥65 to <75 yr         | 19 (43)               | 11 (50)            | 8 (36)             |                |
|                                                                                      | ≥75 yr                | 13 (30)               | 5 (22)             | 8 (36)             |                |
| Sex — no. (%)                                                                        | Male                  | 22 (50)               | 9 (41)             | 13 (59)            | <i>0.37</i>    |
|                                                                                      | Female                | 22 (50)               | 13 (59)            | 9 (41)             |                |
| ECOG performance status — no. (%)                                                    | 0-1                   | 39 (89)               | 20 (91)            | 19 (86)            | <i>1.00</i>    |
|                                                                                      | 2 or more             | 5 (11)                | 2 (9)              | 3 (14)             |                |
| Smoking status — no. (%)                                                             | Never smoked          | 2 (5)                 | 0 (0)              | 2 (9)              | <i>0.48</i>    |
|                                                                                      | Current/former smoker | 42 (95)               | 22 (100)           | 20 (91)            |                |
| Tumor histology — no. (%)                                                            | Squamous              | 12 (27)               | 6 (27)             | 6 (28)             | <i>1.00</i>    |
|                                                                                      | Non-squamous          | 28 (64)               | 14 (64)            | 14 (63)            |                |
|                                                                                      | Others                | 4 (9)                 | 2 (9)              | 2 (9)              |                |
| PD-L1 status — no. (%)                                                               | <1%                   | 6 (14)                | 1 (5)              | 5 (23)             | <i>0.60</i>    |
|                                                                                      | 1-49%                 | 6 (14)                | 4 (18)             | 2 (9)              |                |
|                                                                                      | ≥50%                  | 21 (48)               | 10 (45)            | 11 (50)            |                |
|                                                                                      | Unknown               | 11 (24)               | 7 (32)             | 4 (18)             |                |

Statistical analyses: Chi-Square or Fisher’s exact tests. All tests were two-sided, with no adjustments for multiple comparisons.

**Table S5A. Patient clinical characteristics**

|                                  |                       | Overall (n=338) | Akk <sup>low</sup> (n=101) | Akk <sup>high</sup> (n=30) | Akk <sup>-</sup> (n=207) | P-value |
|----------------------------------|-----------------------|-----------------|----------------------------|----------------------------|--------------------------|---------|
| Age (year)                       | Median (range)        | 65 (24-92)      | 66 (45-85)                 | 67 (44-83)                 | 64 (24-92)               |         |
|                                  | <65 yr                | 163 (48)        | 44 (44)                    | 11 (37)                    | 108 (52)                 |         |
|                                  | ≥65 to <75 yr         | 118 (35)        | 46 (45)                    | 11 (37)                    | 61 (29)                  | 0.15*   |
|                                  | ≥75 yr                | 57 (17)         | 11 (11)                    | 8 (26)                     | 38 (18)                  |         |
| Sex – no (%)                     | Male                  | 226 (67)        | 66 (65)                    | 20 (67)                    | 140 (68)                 | 0.93    |
|                                  | Female                | 112 (33)        | 35 (35)                    | 10 (33)                    | 67 (32)                  |         |
| BMI, kg/cm <sup>2</sup> – no (%) | <25                   | 204 (60)        | 56 (55)                    | 18 (60)                    | 130 (63)                 | 0.54    |
|                                  | [25-30[               | 94 (28)         | 33 (33)                    | 7 (23)                     | 54 (26)                  |         |
|                                  | ≥30                   | 36 (11)         | 11 (11)                    | 5 (17)                     | 20 (10)                  |         |
|                                  | Unknown               | 4 (1)           | 1 (1)                      | 0                          | 3 (1)                    |         |
| ECOG performance status – no (%) | 0-1                   | 268 (79)        | 86 (85)                    | 25 (84)                    | 157 (75)                 | 0.05    |
|                                  | 2 or more             | 43 (13)         | 6 (6)                      | 4 (13)                     | 33 (16)                  |         |
|                                  | Unknown               | 27 (8)          | 9 (9)                      | 1 (3)                      | 17 (8)                   |         |
| Smoking status – no. (%)         | Never smoked          | 26 (8)          | 11 (11)                    | 1 (3)                      | 14 (7)                   | 0.28    |
|                                  | Current/former smoker | 309 (91)        | 89 (88)                    | 29 (97)                    | 191 (92)                 |         |
|                                  | Unknown               | 3 (1)           | 1 (1)                      | 0 (0)                      | 2 (1)                    |         |

|                            |                                |          |         |          |          |      |
|----------------------------|--------------------------------|----------|---------|----------|----------|------|
| Tumor histology — no. (%)  | Squamous                       | 78 (23)  | 22 (22) | 12 (40)  | 44 (21)  | 0.07 |
|                            | Non-squamous                   | 260 (77) | 79 (88) | 18 (60)  | 163 (79) |      |
| Tumor staging — no. (%)    | IIA-IIIB                       | 37 (11)  | 14 (14) | 1 (3)    | 22 (11)  | 0.26 |
|                            | IV                             | 294 (87) | 85 (84) | 29 (97)  | 180 (87) |      |
|                            | Unknown                        | 7 (2)    | 2 (2)   | 0        | 5 (2)    |      |
| TMB — no. (%)              | ≥ 10 mutations/megabase        | 3 (1)    | 1 (1)   | 0        | 2 (1)    | 0.41 |
|                            | < 10 mutations/megabase        | 13 (4)   | 5 (5)   | 4 (13)   | 4 (2)    |      |
|                            | Unknown                        | 322 (95) | 95 (94) | 26 (87)  | 201 (97) |      |
| PD-L1 status — no. (%)     | <1%                            | 64 (19)  | 21 (21) | 10 (33)  | 33 (16)  | 0.26 |
|                            | 1–49%                          | 53 (16)  | 18 (18) | 4 (13)   | 33 (16)  |      |
|                            | ≥50%                           | 118 (35) | 34 (36) | 8 (27)   | 76 (36)  |      |
|                            | Unknown                        | 102 (30) | 28 (27) | 8 (27)   | 66 (32)  |      |
| Therapy line — no. (%)     | Neoadjuvant                    | 3 (1)    | 2 (2)   | 0        | 1 (1)    | 0.13 |
|                            | First line                     | 92 (27)  | 28 (28) | 3 (10)   | 61 (29)  |      |
|                            | ≥ Second line                  | 243 (72) | 71 (72) | 27 (90)  | 145 (70) |      |
| Therapy — no. (%)          | Immunotherapy                  | 327 (97) | 99 (98) | 30 (100) | 198 (96) | 0.31 |
|                            | Immunotherapy and Chemotherapy | 11 (3)   | 2 (2)   | 0 (0)    | 9 (4)    |      |
| Previous therapy — no. (%) | Chemotherapy                   | 239 (71) | 77 (76) | 24 (80)  | 143 (69) | 0.84 |
|                            | Tyrosine kinase inhibitors     | 11 (3)   | 3 (3)   | 1 (3)    | 7 (3)    |      |

|                       |         |          |         |         |          |             |
|-----------------------|---------|----------|---------|---------|----------|-------------|
|                       | Others  | 20 (6)   | 5 (5)   | 0 (0)   | 15 (7)   |             |
|                       | Unknown | 4 (1)    | 1 (1)   | 2 (7)   | 1 (0)    |             |
| Antibiotics — no. (%) | Yes     | 69 (20)  | 15 (15) | 10 (33) | 44 (21)  | <i>0.07</i> |
|                       | No      | 269 (80) | 86 (85) | 20 (67) | 163 (79) |             |

BMI, Body Mass Index; TMB, Tumor Mutational Burden.

Statistical analyses: Mann-Whitney\*, Chi-Square or Fisher's exact tests. All tests were two-sided, with no adjustments for multiple comparisons.

**Table S5B. List of antibiotics (ATB) 60 days prior to ICI**

|                                 |                                                       | Overall (n=69) | Akk <sup>low</sup> (n=15) | Akk <sup>high</sup> (n=10) | Akk -(n=44) | P-value |
|---------------------------------|-------------------------------------------------------|----------------|---------------------------|----------------------------|-------------|---------|
| Duration of ATB — no. (%)       | ≤ 7 days                                              | 23 (33)        | 6 (43)                    | 4 (36)                     | 13 (30)     | 0.80    |
|                                 | > 7 days                                              | 19 (28)        | 2 (14)                    | 4 (36)                     | 13 (30)     |         |
|                                 | Unknown                                               | 27 (39)        | 6 (43)                    | 3 (27)                     | 18 (41)     |         |
| Type of ATB — no. (%)           | β-lactams ± inhibitors (± combination with other ATB) | 48 (70)        | 9 (64)                    | 11 (100)                   | 28 (64)     | 0.95    |
|                                 | Quinolones (± combination with other ATB)             | 9 (13)         | 1 (7)                     | 1 (9)                      | 7 (16)      |         |
|                                 | Macrolides                                            | 5 (7)          | 0                         | 0                          | 5 (11)      |         |
|                                 | Sulfonamides                                          | 8 (12)         | 1 (7)                     | 0                          | 4 (9)       |         |
|                                 | Tetracyclines                                         | 1 (1)          | 0                         | 0                          | 1 (2)       |         |
|                                 | Aminoglycosides                                       | 1 (1)          | 0                         | 0                          | 1 (2)       |         |
|                                 | Unknown                                               | 4 (6)          | 1 (7)                     | 0                          | 3 (7)       |         |
|                                 | ECOG performance status — no. (%)                     | 0-1            | 50 (72)                   | 13 (87)                    | 8 (80)      |         |
|                                 | 2 >                                                   | 13 (19)        | 0                         | 2 (20)                     | 11 (25)     |         |
|                                 | Unknown                                               | 6 (9)          | 2 (13)                    | 0                          | 4 (9)       |         |
| Number of ATB courses — no. (%) | 1                                                     | 39 (57)        | 11 (79)                   | 3 (27)                     | 25 (57)     | 0.45    |
|                                 | 2                                                     | 15 (22)        | 3 (21)                    | 5 (45)                     | 7 (16)      |         |
|                                 | 3                                                     | 6 (9)          | 0                         | 1 (9)                      | 5 (11)      |         |

|                      |                  |         |         |        |         |      |
|----------------------|------------------|---------|---------|--------|---------|------|
|                      | 4                | 2 (3)   | 0       | 2 (18) | 0 (0)   |      |
|                      | Unknown          | 6 (9)   | 0       | 0      | 7 (16)  |      |
|                      | Prophylactic ATB | 3 (4)   | 0       | 0      | 3 (7)   |      |
| Indication — no. (%) | Therapeutic ATB  | 52 (75) | 14 (93) | 3 (30) | 35 (79) | 0.49 |
|                      | Unknown          | 14 (21) | 1 (7)   | 7 (70) | 6 (14)  |      |

ATB, Antibiotics.

Statistical analyses: Chi-Square or Fisher's exact tests. All tests were two-sided, with no adjustments for multiple comparisons.

**Table S6. Uni-Multi-ariate analyses for OS**

|                         |              | Univariate |                   |                 | Multivariate       |               |
|-------------------------|--------------|------------|-------------------|-----------------|--------------------|---------------|
|                         |              | N          | HR (CI 95%)       | P-value         | HR (CI 95%)        | P-value       |
| <i>A. muciniphila</i>   | No           | 207        | Reference         |                 | Reference          |               |
|                         | Low          | 101        | 0.56 (0.39 – 0.8) | <b>0.002</b>    | 0.63 (0.44 – 0.92) | <b>0.015</b>  |
|                         | High         | 30         | 1.58 (1.00 – 2.5) | <b>0.049</b>    | 1.67 (1.03 – 2.71) | <b>0.038</b>  |
| Age                     | (continuous) | 338        | 1.00 (0.98 – 1.0) | 0.656           | 0.99 (0.98 – 1.01) | 0.379         |
| Sex                     | Female       | 112        | Reference         |                 | Reference          |               |
|                         | Male         | 226        | 0.88 (0.65 – 1.2) | 0.437           | 0.88 (0.63 – 1.21) | 0.419         |
| ECOG Performance status | 0            | 122        | Reference         |                 | Reference          |               |
|                         | 1            | 146        | 2.00 (1.41 – 2.9) | <b>0.000114</b> | 1.78 (1.23 – 2.57) | <b>0.002</b>  |
|                         | >2           | 43         | 2.49 (1.59 – 3.9) | <b>7.43e-05</b> | 2.27 (1.40 – 3.67) | <b>0.0005</b> |
|                         | Unknown      | 27         | 0.87 (0.39 – 1.9) | 0.7             | 0.84 (0.37 – 1.89) | 0.676         |
| ATB                     | No           | 269        | Reference         |                 | Reference          |               |
|                         | Yes          | 69         | 1.6 (1.1 – 2.3)   | <b>0.009</b>    | 1.36 (0.95 – 1.94) | 0.088         |
| Histology               | Non-Squamous | 260        | Reference         |                 | Reference          |               |
|                         | Squamous     | 78         | 1.1 (0.81 – 1.6)  | 0.467           | 1.11 (0.78 – 1.58) | 0.556         |
| PD-L1                   | <1%          | 64         | Reference         |                 | Reference          |               |
|                         | 1-49%        | 53         | 1.10 (0.65 – 1.9) | 0.733           | 1.11 (0.65 – 1.91) | 0.708         |

|                    |         |     |                   |              |                    |              |
|--------------------|---------|-----|-------------------|--------------|--------------------|--------------|
|                    | ≥50%    | 118 | 0.99 (0.63 – 1.5) | <b>0.957</b> | 0.90 (0.53 – 1.54) | <b>0.713</b> |
|                    | Unknown | 102 | 1.40 (0.92 – 2.1) | <b>0.117</b> | 1.22 (0.78 – 1.89) | <b>0.382</b> |
| Immunotherapy Line | 1       | 98  | Reference         |              | Reference          |              |
|                    | 2       | 240 | 1.1 (0.8 – 1.6)   | <b>0.485</b> | 0.87 (0.54 – 1.4)  | <b>0.575</b> |

ATB, Antibiotics. *P*-values were calculated using the Wald test including each covariate separately in a Cox Proportional Hazards Regression Model. Significant *P*-value were marked in bold.

**Table S7. *A.muciniphila*-associated intestinal commensalism potentially relevant to predict overall survival.**

| adjP      | MaAsLin2<br>LogFC | CI.UP   | CI.L    | Taxa                                    | PKM trichotomic<br>distribution | PKM Binary<br>with Akk |
|-----------|-------------------|---------|---------|-----------------------------------------|---------------------------------|------------------------|
| 5.578e-08 | 2.1311            | 2.4577  | 1.80457 | <i>Akkermansia_muciniphila</i>          |                                 |                        |
| 0.0012    | 1.8706            | 2.2980  | 1.44327 | <i>Intestinimonas_butyriciproducens</i> | 0.19                            | Not done               |
| 0.0012    | 1.6276            | 2.0011  | 1.2542  | <i>Ruminococcaceae_bacterium_D5</i>     | 0.1217                          | Not done               |
| 0.0019    | 1.4563            | 1.8048  | 1.1078  | <i>Eubacterium_hallii</i>               | 0.0180                          | 0.0265                 |
| 0.0237    | 1.2512            | 1.6163  | 0.8860  | <i>Roseburia_hominis</i>                | Not done                        | Not done               |
| 0.0237    | 1.5531            | 2.0039  | 1.1023  | <i>Ruminococcaceae_bacterium_D16</i>    | Not done                        | Not done               |
| 0.0295    | 1.2471            | 1.6226  | 0.8716  | <i>Coprobacter_fastidiosus</i>          | 0.0344                          | 0.1290                 |
| 0.0311    | 0.8399            | 1.0967  | 0.5830  | <i>Bacteroides_plebeius</i>             | Not done                        | Not done               |
| 0.0343    | 1.0605            | 1.3916  | 0.7294  | <i>Anaerostipes_hadrus</i>              | 0.0059                          | 0.06                   |
| 0.0356    | 0.9916            | 1.3102  | 0.6731  | <i>Bacteroides_ovatus</i>               | Not done                        | Not done               |
| 0.0356    | 1.2895            | 1.7081  | 0.8710  | <i>Alistipes_indistinctus</i>           | 0.23                            | Not done               |
| 0.0356    | 0.8481            | 1.1229  | 0.5734  | <i>Eubacterium_eligens</i>              | Not done                        | Not done               |
| 0.0356    | -1.3844           | -0.9363 | -1.8324 | <i>Clostridium_innocuum</i>             | <0.0001                         | 0.1190                 |
| 0.0379    | 1.1870            | 1.5777  | 0.79632 | <i>Parasutterella_excrementihominis</i> | 0.0063                          | Not done               |
| 0.0432    | -1.1987           | -0.7960 | -1.6014 | <i>Dielma_fastidiosa</i>                | Not done                        | Not done               |
| 0.0466    | 0.9117            | 1.2226  | 0.6008  | <i>Bifidobacterium_adolescentis</i>     | 0.0181                          | 0.0391                 |
| 0.0487    | 1.1409            | 1.5344  | 0.7474  | <i>Harryflintia_acetispora</i>          | Not done                        | Not done               |

adjP, Adjusted P-value using MaAslin2 multivariate analysis; LogFC, Log Fold Change; CI, Confidence Interval; UP, upper; L, Lower; PKM, P-value Kaplan-Meier.

Table illustrating information presented in Figure 3.
